# Supplementary material for: Isolation of infectious SARS-CoV-2 from urine of a COVID-19 patient
Source: Emerg Microbes Infect. 2020 May 18;9(1):991–3. doi: 10.1080/22221751.2020.1760144 (PMC7301718; doi:10.1080/22221751.2020.1760144)
Supplement: Supplemental Material [file TEMI_A_1760144_SM2136.docx]

**SUPPLEMENTAL Appendix**

**Isolation of Infectious SARS-CoV-2 from urine of a COVID-19 Patient**

**Running title:** Infectious SARS-CoV-2 in patient’s urine

Jing Sun1*, Airu Zhu1*, Heying Li2*, Kui Zheng3*, Zhen Zhuang1*, Zhao Chen1*, Yongxia Shi3*, Zhaoyong Zhang1*, Si-bei Chen1*, Xuesong Liu1*, Jun Dai3, Xiaobo Li3, Shuxiang Huang3, Xiaofang Huang1, Ling Luo1, Liyan Wen1, Jianfen Zhuo1, Yuming Li1, Yanqun Wang1, Lu Zhang1, Yanjun Zhang1, Fang Li1, Liqiang Feng2, Xinwen Chen2, Nanshan Zhong1, Zifeng Yang1#, Jicheng Huang3#, Jincun Zhao1,4#, Yi-min Li1#

1State Key Laboratory of Respiratory Disease, National Clinical Research Center for Respiratory Disease, Guangzhou Institute of Respiratory Health, the First Affiliated Hospital of Guangzhou Medical University, Guangzhou, China 510182

2State Key Laboratory of Respiratory Disease, Guangzhou Institutes of Biomedicine and Health, Chinese Academy of Sciences, Guangzhou, China 510530

3Guangzhou Customs District Technology Center, Guangzhou, China 510700

4Institute of Infectious disease, Guangzhou Eighth People's Hospital of Guangzhou Medical University, Guangzhou, China 510182

*Contributed equally to this manuscript

#Corresponding authors: Dr. Jincun Zhao, [zhaojincun@gird.cn](mailto:zhaojincun@gird.cn)

Dr. Yimin Li, dryiminli@vip.163.com

Dr. Jicheng Huang, [jichenghuang@126.com](mailto:jichenghuang@126.com)

Dr. Zifeng Yang, jeffyah@163.com


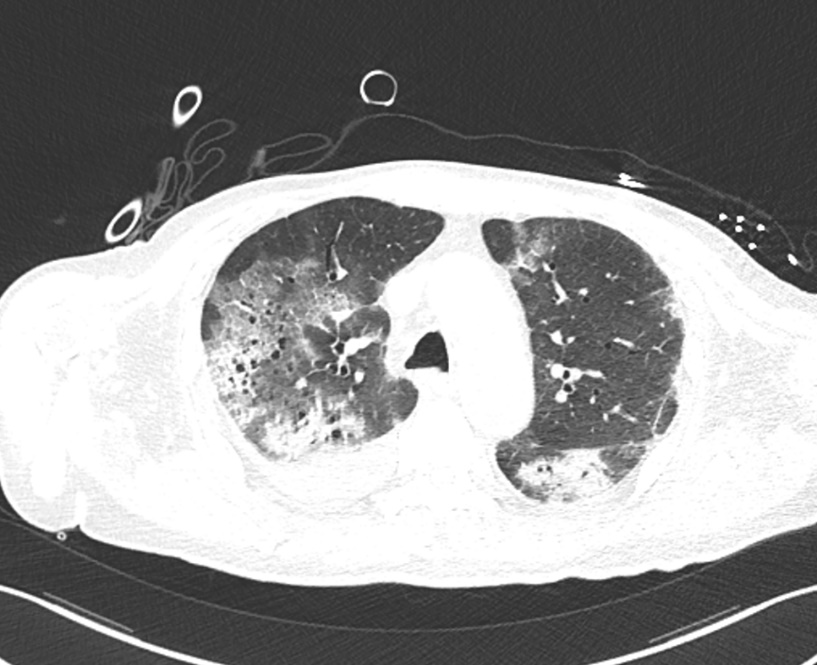


**Figure S1. Chest CT scan of the SARS-CoV-2 infected patient**

**Table S1. Nucleotide and amino acid changes between original virus strain (Wuhan-Hu-1 NC_045512.2) and the virus isolated from the patient’s urine.**

| Genome nucleotide position | Protein | Nucleotides changes | | Amino acides changes |
| --- | --- | --- | --- | --- |
| NC_045512.2 | Urine SARS-CoV-2 |
| 6819 | ORF1ab | G | T | Ser>Ile |
| 6996 | ORF1ab | T | C | Ile>Thr |
| 14235 | ORF1ab | C | T | Thr>Ile |
| 17373 | ORF1ab | C | T | Synonymous |
| 29527 | N | G | A | Synonymous |
